# Supplementary material for: A PH-functionalized dicationic bis(imidazolio)diphosphine
Source: Royal Society of Chemistry journal article supplement (doi:10.1039/d1dt03978d), 2021-12-16
Supplement: d1dt03978d1.pdf [file d1dt03978d1.pdf]

## Supplementary information

### *A PH-functionalized dicationic bis(imidazolio)diphosphine*

Mario Cicač-Hudi,<sup>a</sup> Christoph M. Feil,<sup>a</sup> Nicholas Birchall,<sup>a</sup> Martin Nieger<sup>b</sup> and Dietrich Gudat

<sup>a</sup> Institute of Inorganic Chemistry, University of Stuttgart, Stuttgart, Germany

<sup>b</sup> Department of Chemistry, University of Helsinki, University of Helsinki, Finland.

E-Mail: [dietrich.gudat@iac.uni-stuttgart.de](mailto:dietrich.gudat@iac.uni-stuttgart.de)

### Table of contents

|                          |       |
|--------------------------|-------|
| Crystallographic Studies | p. 2  |
| NMR Spectra              | p. 3  |
| Computational Studies    | p. 10 |

## Crystallographic studies

**Table S1.** Crystallographic data for [5a][Gal<sub>4</sub>]<sub>2</sub> · 4 MeCN, [5b]<sub>2</sub>, [6a]I · 2 THF.

|                                                | [5a][Gal <sub>4</sub> ] <sub>2</sub> · 4 MeCN                                                                          | [5b] <sub>2</sub>                                                   | [6a]I · 2 THF                                                                                        |
|------------------------------------------------|------------------------------------------------------------------------------------------------------------------------|---------------------------------------------------------------------|------------------------------------------------------------------------------------------------------|
| CSD                                            | 2117071                                                                                                                | 2117070                                                             | 2117072                                                                                              |
| sum formula                                    | C <sub>54</sub> H <sub>74</sub> N <sub>4</sub> P <sub>2</sub> , 2 Gal <sub>4</sub> , 4 C <sub>2</sub> H <sub>3</sub> N | C <sub>42</sub> H <sub>50</sub> N <sub>4</sub> P <sub>2</sub> , 2 I | C <sub>54</sub> H <sub>73</sub> N <sub>4</sub> P <sub>2</sub> , 2 C <sub>4</sub> H <sub>8</sub> O, I |
| <i>M</i> / g mol <sup>-1</sup>                 | 2159.96                                                                                                                | 926.60                                                              | 1111.21                                                                                              |
| <i>T</i>                                       | 135(2)                                                                                                                 | 130(2)                                                              | 135(2)                                                                                               |
| radiation                                      | Mo-K <sub>α</sub>                                                                                                      | Cu-K <sub>α</sub>                                                   | Mo-K <sub>α</sub>                                                                                    |
| wavelength                                     | 0.71073 Å                                                                                                              | 1.54178 Å                                                           | 0.71073 Å                                                                                            |
| crystal system                                 | Monoclinic                                                                                                             | Monoclinic                                                          | Monoclinic                                                                                           |
| space group                                    | P2 <sub>1</sub> /n                                                                                                     | P2 <sub>1</sub> /n                                                  | P2 <sub>1</sub> /n                                                                                   |
| <i>a</i> / Å                                   | 12.4012(5)                                                                                                             | 10.1170(11)                                                         | 12.5439(5)                                                                                           |
| <i>b</i> / Å                                   | 23.3184(9)                                                                                                             | 31.818(3)                                                           | 30.8252(12)                                                                                          |
| <i>c</i> / Å                                   | 14.3517(6)                                                                                                             | 12.8882(16)                                                         | 15.6529(5)                                                                                           |
| <i>α</i> / °                                   | 90                                                                                                                     | 90                                                                  | 90                                                                                                   |
| <i>β</i> / °                                   | 103.908(2)                                                                                                             | 94.567(10)                                                          | 91.466(2)                                                                                            |
| <i>γ</i> / °                                   | 90                                                                                                                     | 90                                                                  | 90                                                                                                   |
| <i>V</i> / Å <sup>3</sup>                      | 4028.5(3)                                                                                                              | 4135.6(8)                                                           | 6050.5(4)                                                                                            |
| <i>Z</i>                                       | 2                                                                                                                      | 4                                                                   | 4                                                                                                    |
| <i>ρ</i> <sub>calcd</sub> / g cm <sup>-3</sup> | 1.781                                                                                                                  | 1.488                                                               | 1.220                                                                                                |
| <i>F</i> (000)                                 | 2060                                                                                                                   | 1864                                                                | 2352                                                                                                 |
| crystal size / mm <sup>3</sup>                 | 0.790 x 0.424 x 0.379                                                                                                  | 0.098 x 0.028 x 0.024                                               | 0.158 x 0.137 x 0.096                                                                                |
| Θ-range / °                                    | 1.703 to 33.241                                                                                                        | 2.777 to 66.528                                                     | 1.753 to 26.428                                                                                      |
| <i>μ</i> <sub>abs</sub> / mm <sup>-1</sup>     | 3.812                                                                                                                  | 12.928                                                              | 0.626                                                                                                |
| Refl. Collected                                | 62139                                                                                                                  | 36737                                                               | 56955                                                                                                |
| Refl. Unique                                   | 15393                                                                                                                  | 7005                                                                | 12446                                                                                                |
| Refl. Obsd. ( <i>I</i> > 2σ( <i>I</i> ))       | 11510                                                                                                                  | 4926                                                                | 9286                                                                                                 |
| <i>R</i> <sub>int</sub>                        | 0.0295                                                                                                                 | 0.1280                                                              | 0.0434                                                                                               |
| Compl. to Θ = 25.242° <sup>a)</sup>            | 0.999                                                                                                                  | 0.961                                                               | 1.000                                                                                                |
| Absorp. corr.                                  | Multi-scan                                                                                                             | Multi-scan                                                          | Multi-scan                                                                                           |
| Max. / min. transm.                            | 0.6233 / 0.3662                                                                                                        | 0.7528 / 0.4710                                                     | 0.9491 / 0.8067                                                                                      |
| Data/restraints/parameters                     | 15393 / 19 / 376                                                                                                       | 7005 / 5 / 470                                                      | 12446 / 103 / 654                                                                                    |
| GoF ( <i>F</i> <sup>2</sup> )                  | 1.023                                                                                                                  | 1.027                                                               | 1.022                                                                                                |
| <i>R</i> [ <i>I</i> > 2σ( <i>I</i> )]          | 0.0299                                                                                                                 | 0.0438                                                              | 0.0455                                                                                               |
| <i>wR2</i> (all data)                          | 0.0548                                                                                                                 | 0.0995                                                              | 0.1067                                                                                               |
| Largest diff. peak and hole/e Å <sup>-3</sup>  | 1.368 / -1.413                                                                                                         | 0.940 / -0.612                                                      | 1.519 / -1.124                                                                                       |

a) Θ-full range according to the IUCr-rules.

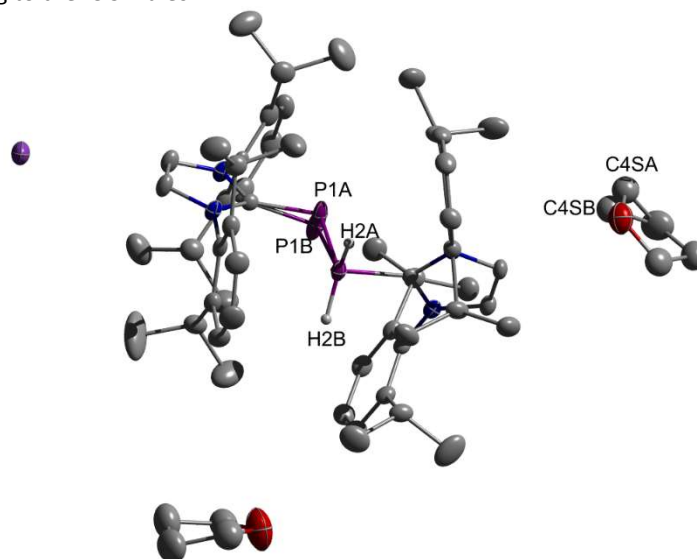

**Figure S1.** Representation of the molecular structure of [6a]I · 2 THF showing the positions of the disordered atoms. Occupancy factors are 0.55/0.45 for P1A/P1B and H2A/H2B and 0.63/0.37 for C4SA/C4SB, respectively. Thermal ellipsoids were drawn at the 50% probability level.

## NMR spectra

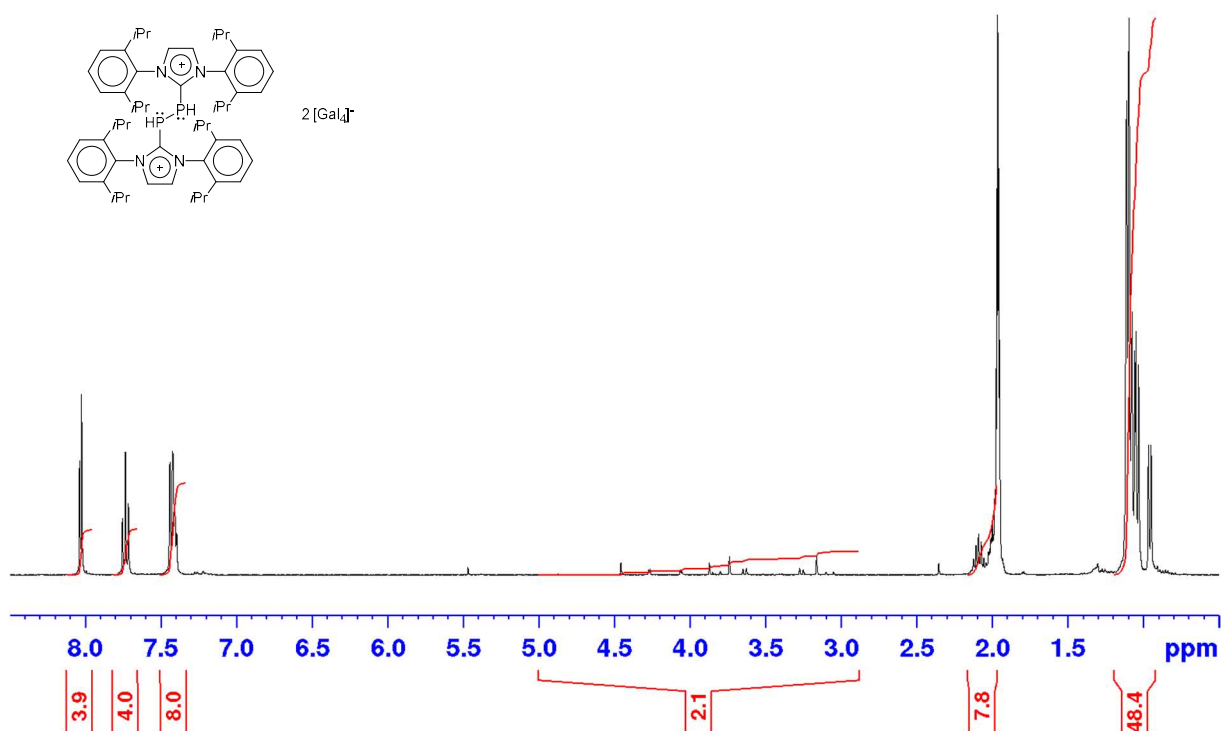

Figure S2.  $^1\text{H}$  NMR spectrum ( $\text{CD}_3\text{CN}$ , 400 MHz, 296 K) of  $[\mathbf{5a}][\text{Gal}_4]_2$ .

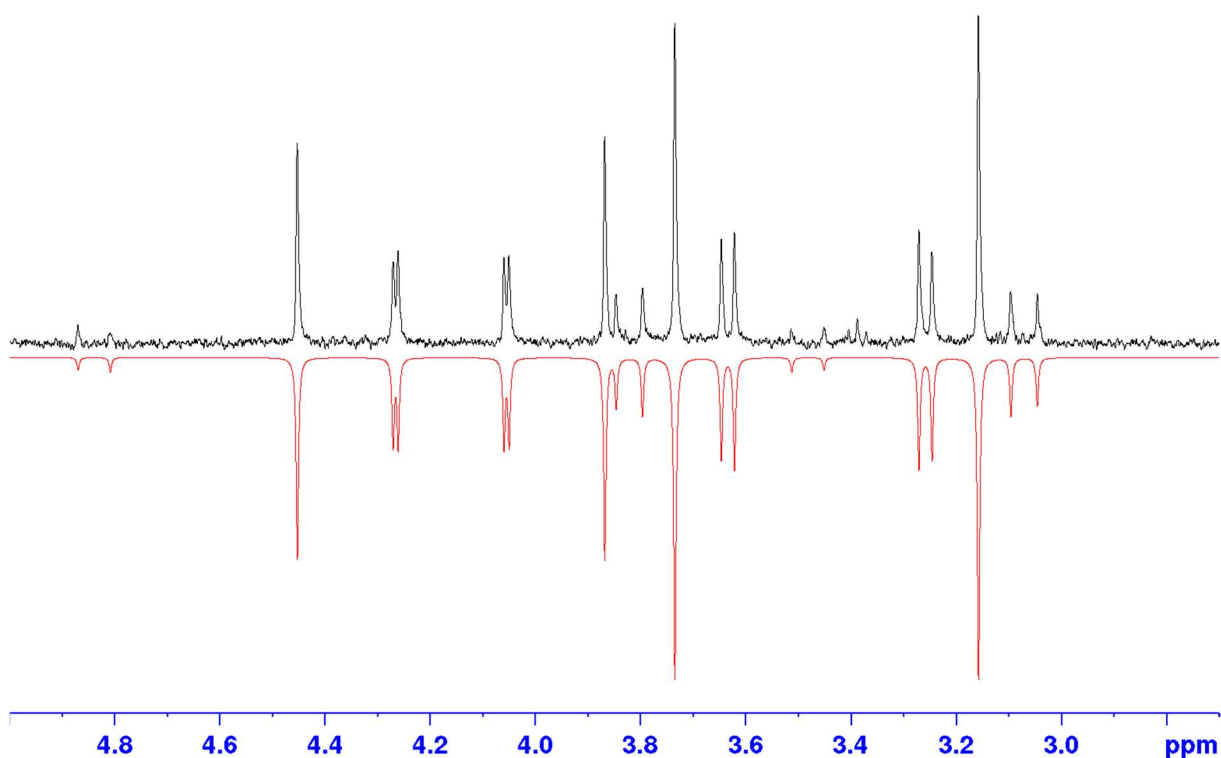

Figure S3. Expansion of the  $^1\text{H}$  NMR spectrum ( $\text{CD}_3\text{CN}$ , 400 MHz, 296 K) of  $[\mathbf{5a}][\text{Gal}_4]_2$  showing the observed (black trace) and simulated (red trace) PH-signal. The isomer ratio determined from the fit is  $n(\text{meso}) : n(\text{rac}) = 61 : 39$ .

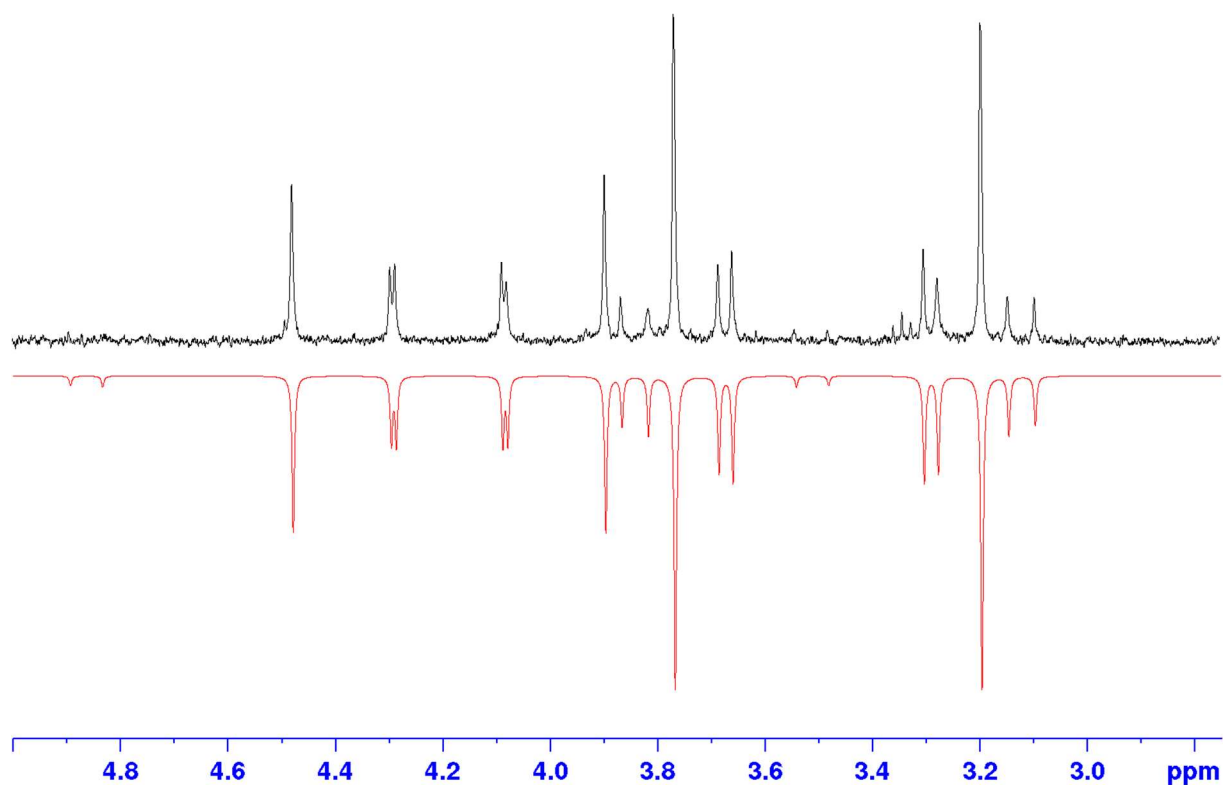

**Figure S4.** Expansion of the  $^1\text{H}$  NMR spectrum ( $\text{CD}_3\text{CN}$ , 400 MHz, 243 K) of  $[\mathbf{5a}][\text{Gal}_4]_2$  showing the observed (black trace) and simulated (red trace, fitted parameters: *meso*-isomer (68%):  $\delta^1\text{H} = 3.48$ ,  $^1J_{\text{PH}} = 219.1$  Hz,  $^2J_{\text{PH}} = 9.5$  Hz,  $^1J_{\text{PP}} = 67.7$  Hz,  $^3J_{\text{HH}} = 15.1$  Hz; *rac*-isomer (32%):  $\delta^1\text{H} = 4.19$ ,  $^1J_{\text{PH}} = 222.4$  Hz,  $^2J_{\text{PH}} = 10.6$  Hz,  $^1J_{\text{PP}} = 229.0$  Hz,  $^3J_{\text{HH}} = 13.8$  Hz.) PH-signal.

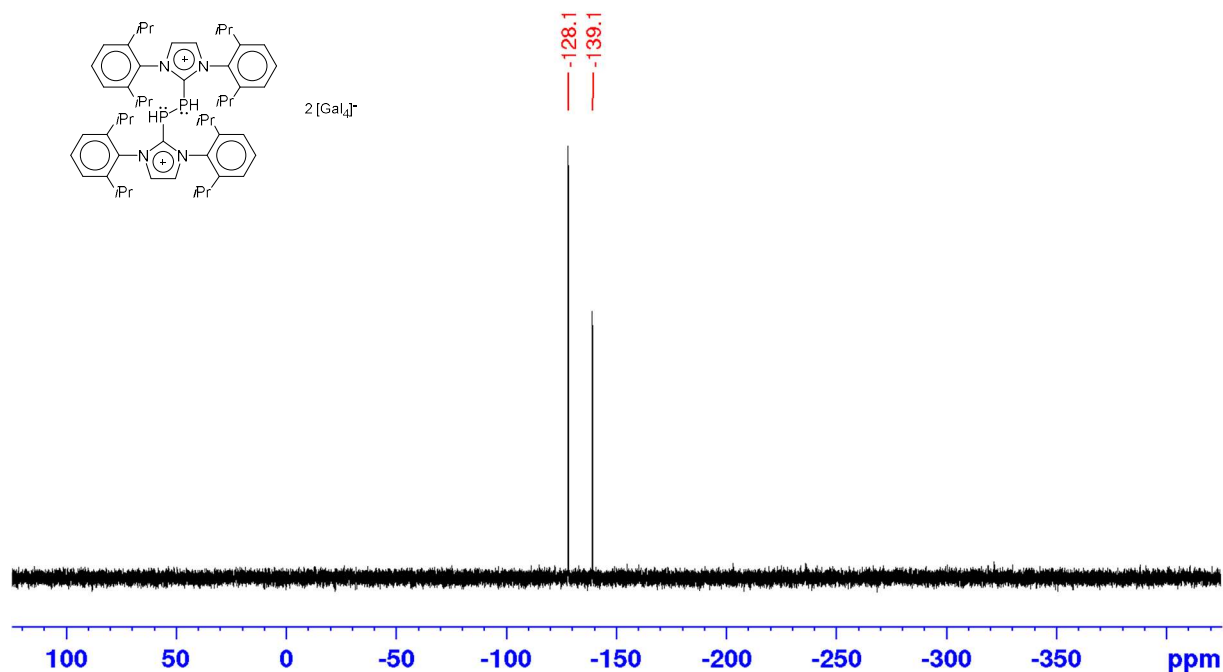

**Figure S5.**  $^{31}\text{P}\{^1\text{H}\}$  NMR spectrum ( $\text{CD}_3\text{CN}$ , 162 MHz, 296 K) of  $[\mathbf{5a}][\text{Gal}_4]_2$  (mixture of *meso*- and *rac*-isomers).

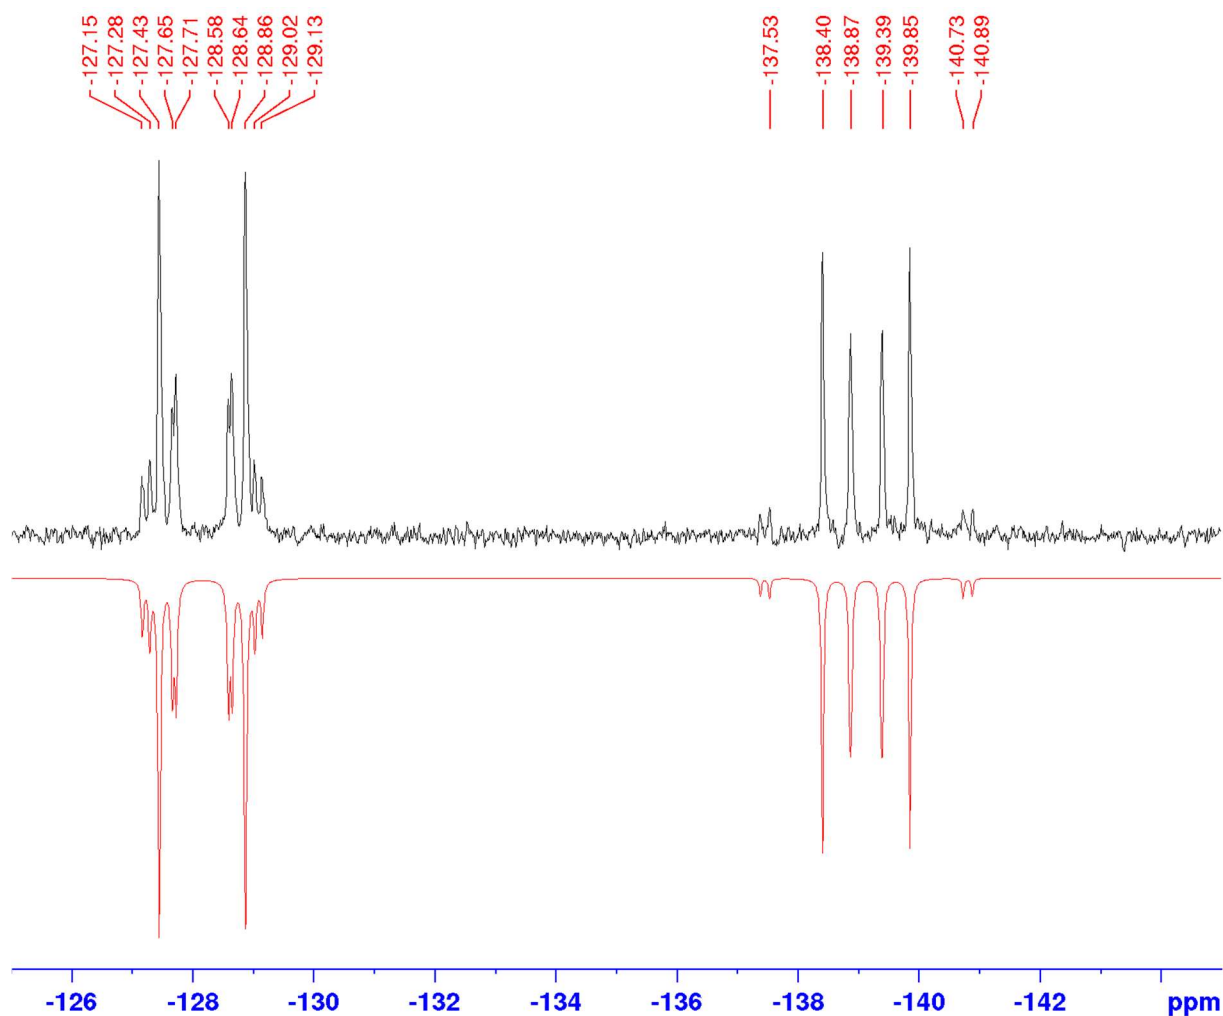

**Figure S6.** Observed (black trace) and simulated (red trace)  $^{31}\text{P}$  NMR spectrum ( $\text{CD}_3\text{CN}$ , 162 MHz) of  $[\mathbf{5a}][\text{Gal}_4]_2$ .

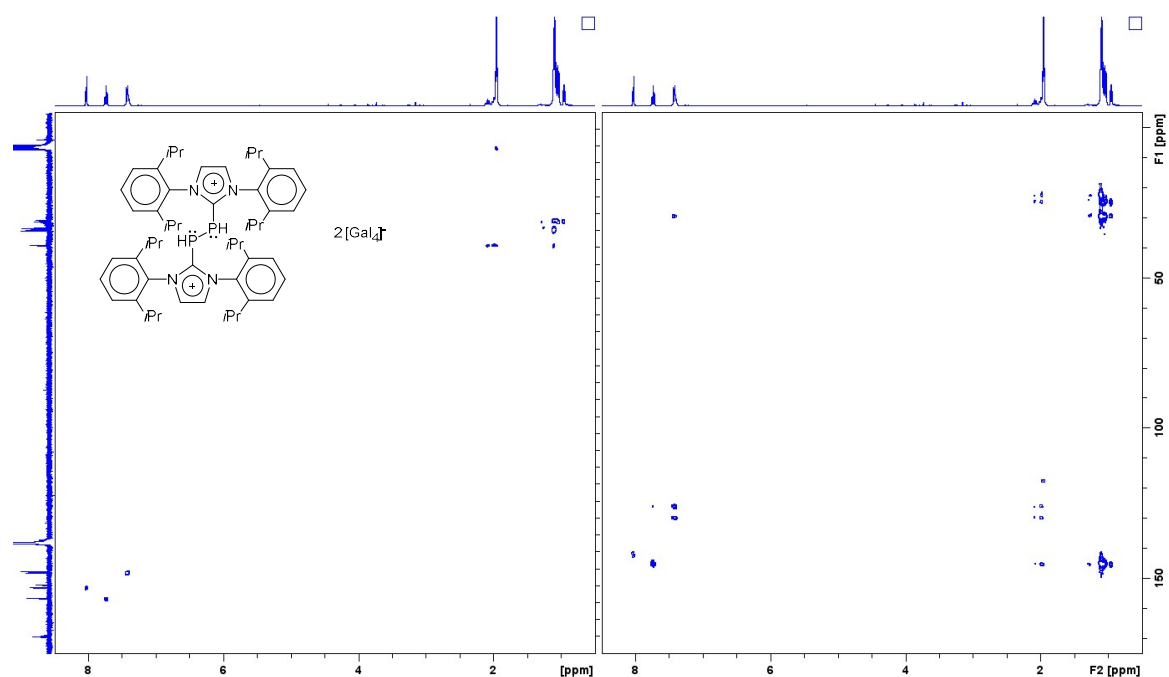

**Figure S7.**  $^1\text{H}$ ,  $^{13}\text{C}$  gSHMOC (left) and gSHMBC (right) NMR spectra ( $\text{CD}_3\text{CN}$ , 400 MHz) of  $[\mathbf{5a}][\text{Gal}_4]_2$ . The  $^{13}\text{C}\{^1\text{H}\}$  NMR spectrum is shown as projection on the left side of the 2D matrixes.

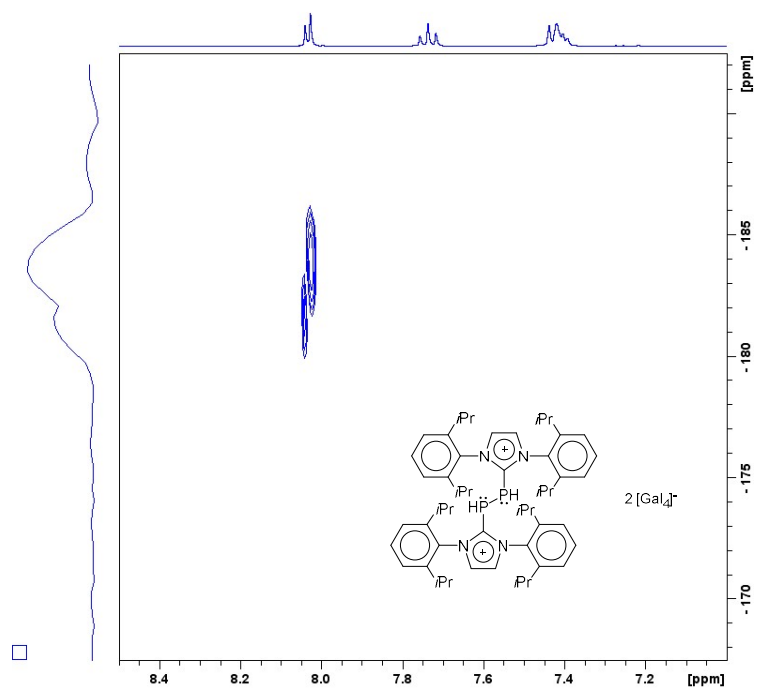

Figure S8.  $^1\text{H},^{15}\text{N}$  HMBC NMR spectrum ( $\text{CD}_3\text{CN}$ , 400 MHz) of  $[\mathbf{5a}][\text{Gal}_4]_2$ .

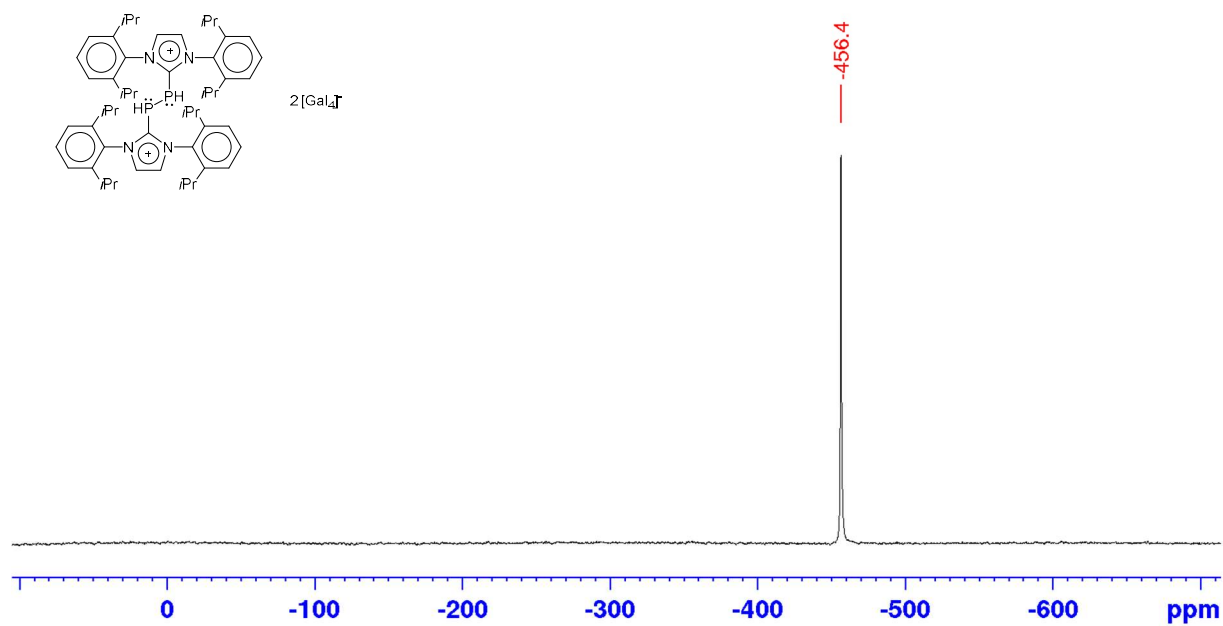

Figure S9.  $^{71}\text{Ga}$  NMR spectrum ( $\text{CD}_3\text{CN}$ , 122 MHz) of  $[\mathbf{5a}][\text{Gal}_4]_2$ .

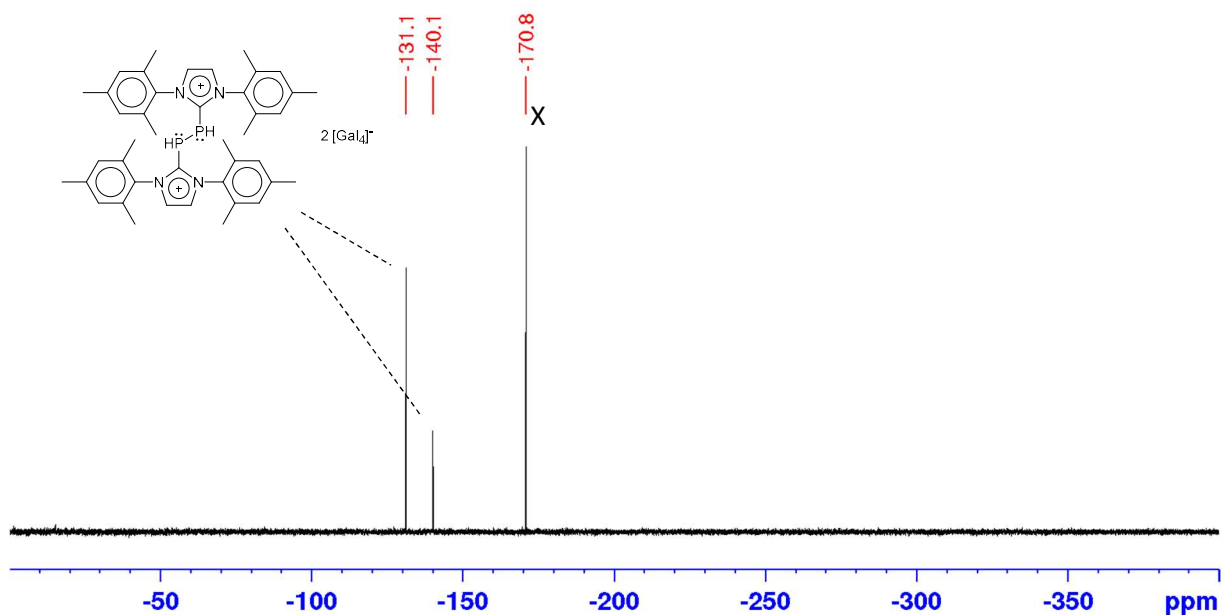

**Figure S10.**  $^{31}\text{P}\{^1\text{H}\}$  NMR spectrum ( $\text{CH}_3\text{CN}/\text{THF}$ , 162 MHz) of a mixture of  $[\mathbf{5b}][\text{Gal}_4]_2$  (61%) and  $[\mathbf{3b}][\text{Gal}_4]$  (marked X, 39%).

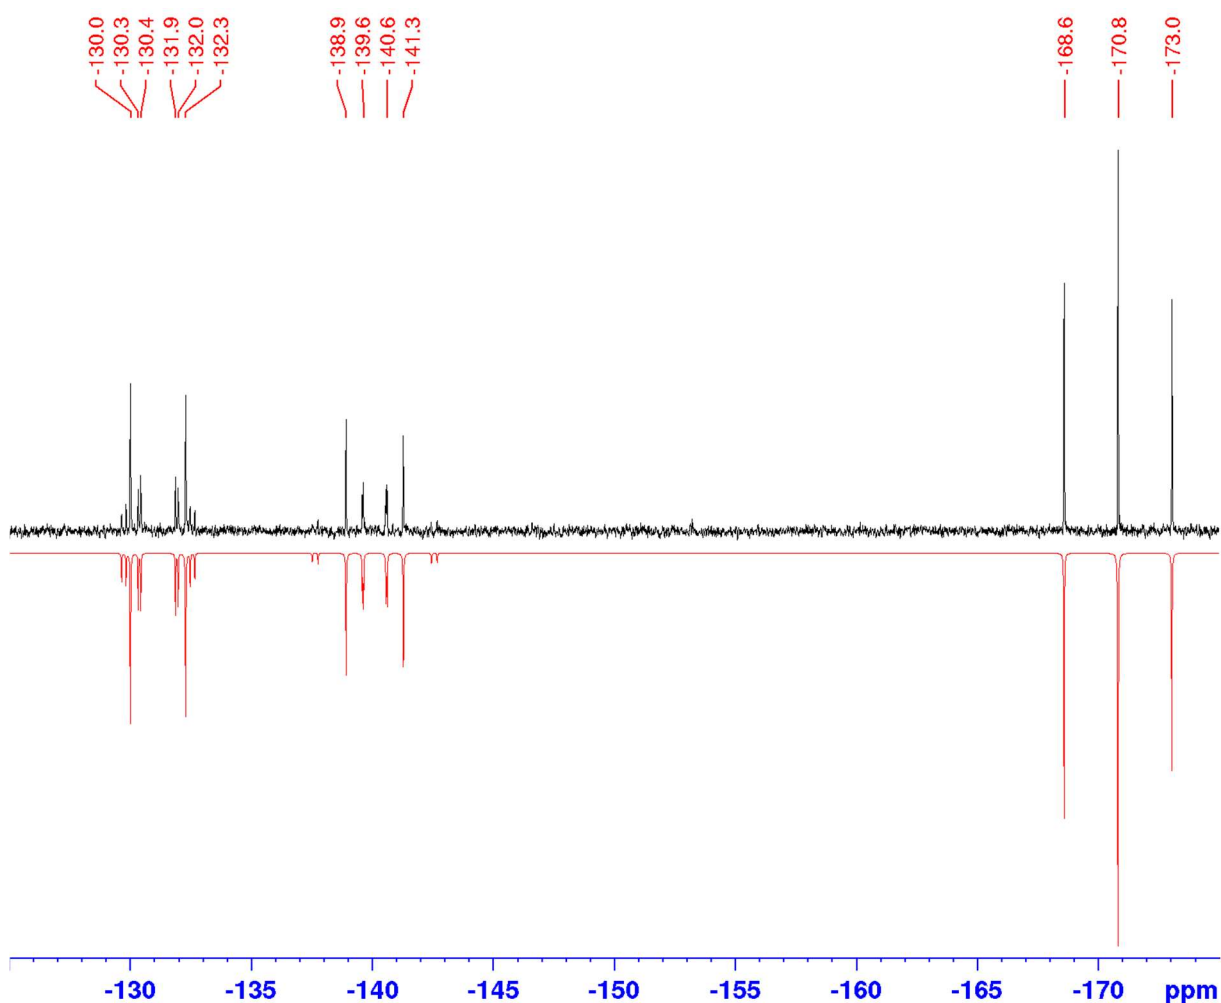

**Figure S11.** Observed (black trace) and simulated (red trace)  $^{31}\text{P}$  NMR spectrum ( $\text{CH}_3\text{CN}/\text{THF}$ , 162 MHz) of a mixture of  $[\mathbf{5b}][\text{Gal}_4]_2$  (61%) and  $[\mathbf{3b}][\text{Gal}_4]$ .

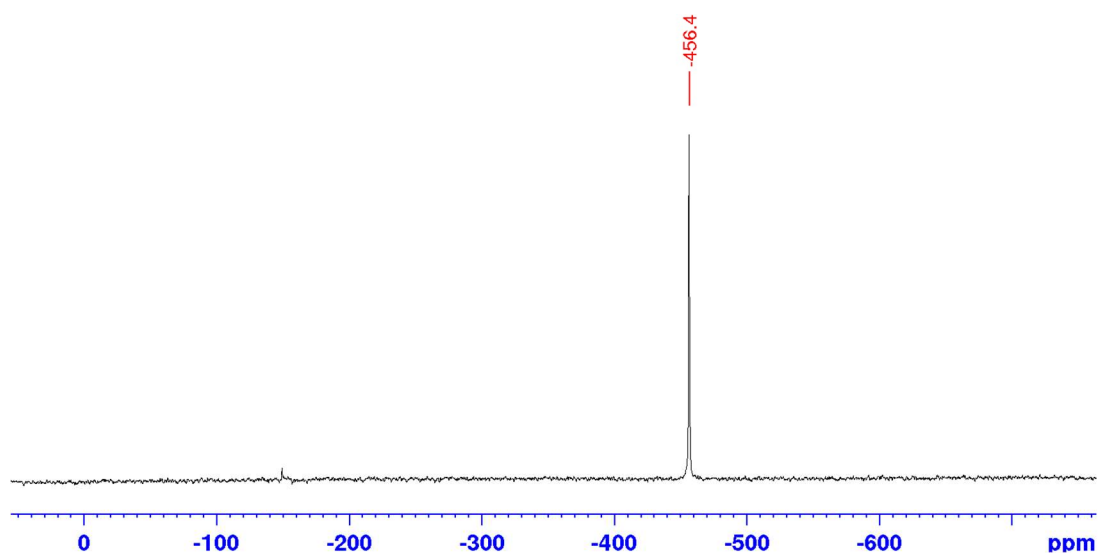

Figure S12.  $^{71}\text{Ga}$  NMR spectrum ( $\text{CH}_3\text{CN}/\text{THF}$ , 122 MHz) of a mixture of  $[\mathbf{5b}][\text{GaI}_4]_2$  (61%) and  $[\mathbf{3b}][\text{GaI}_4]$  (39%).

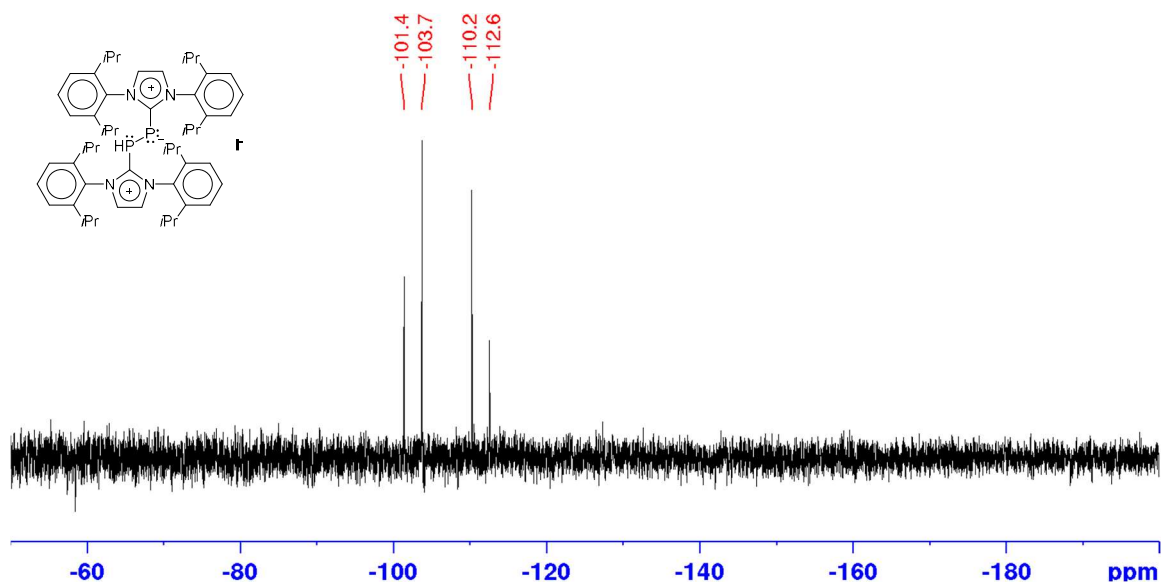

Figure S13.  $^{31}\text{P}\{^1\text{H}\}$  NMR spectrum ( $\text{CD}_3\text{CN}$ , 162 MHz) of  $[\mathbf{6a}]\text{I} \cdot 2 \text{THF}$ .

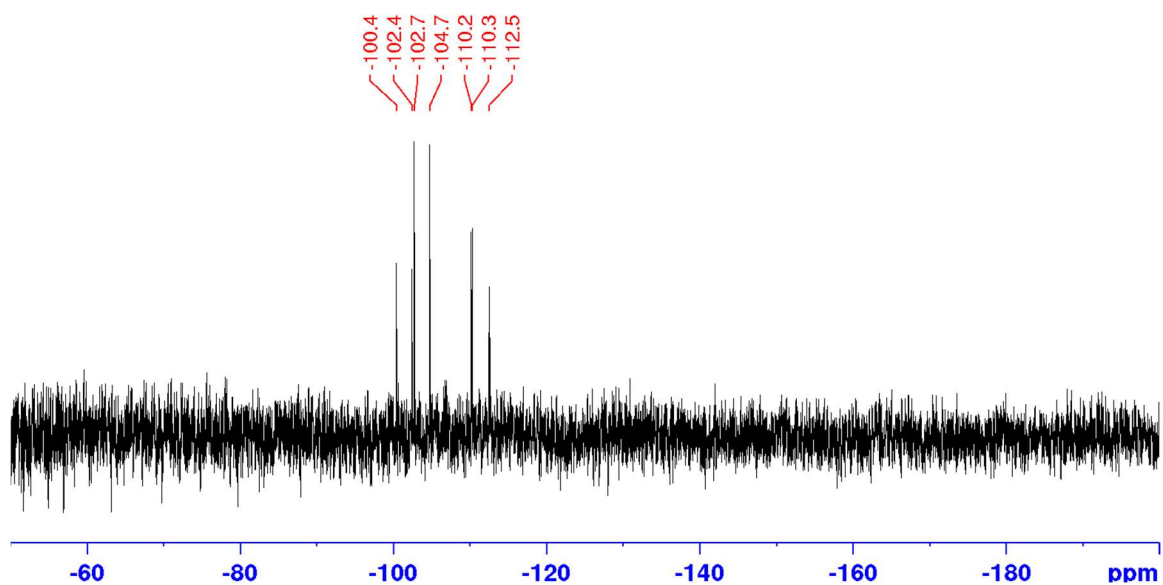

Figure S14.  $^{31}\text{P}$  NMR spectrum ( $\text{CD}_3\text{CN}$ , 162 MHz) of  $[\mathbf{6a}]\text{I} \cdot 2 \text{THF}$ .



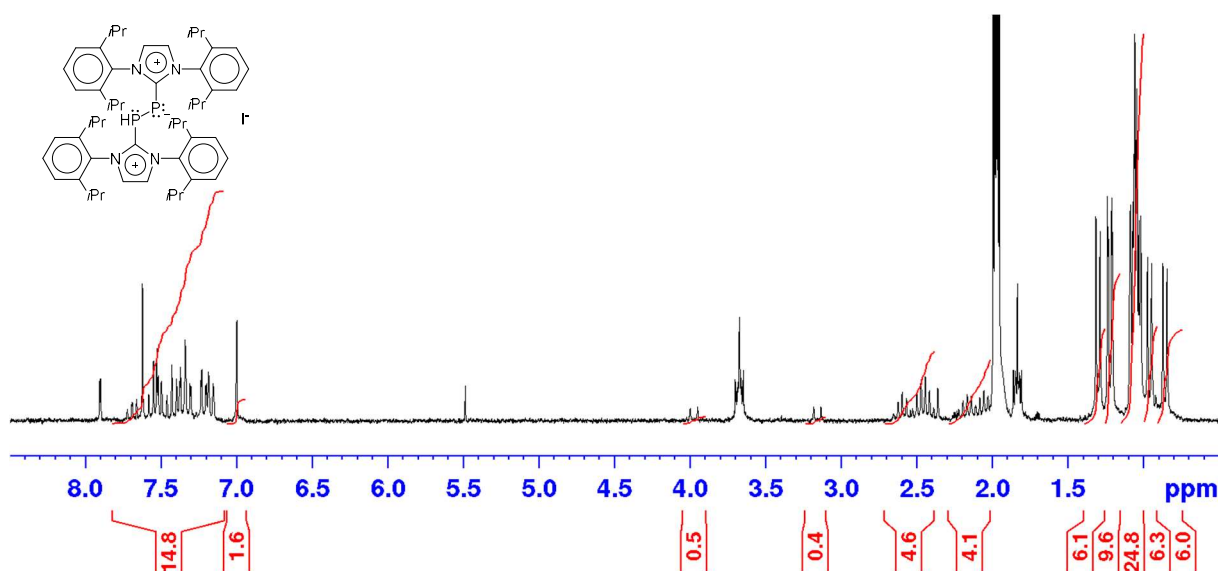

Figure S15.  $^1\text{H}$  NMR spectrum ( $\text{CD}_3\text{CN}$ , 400 MHz) of  $[\mathbf{6a}]\text{I} \cdot 2 \text{ THF}$ .

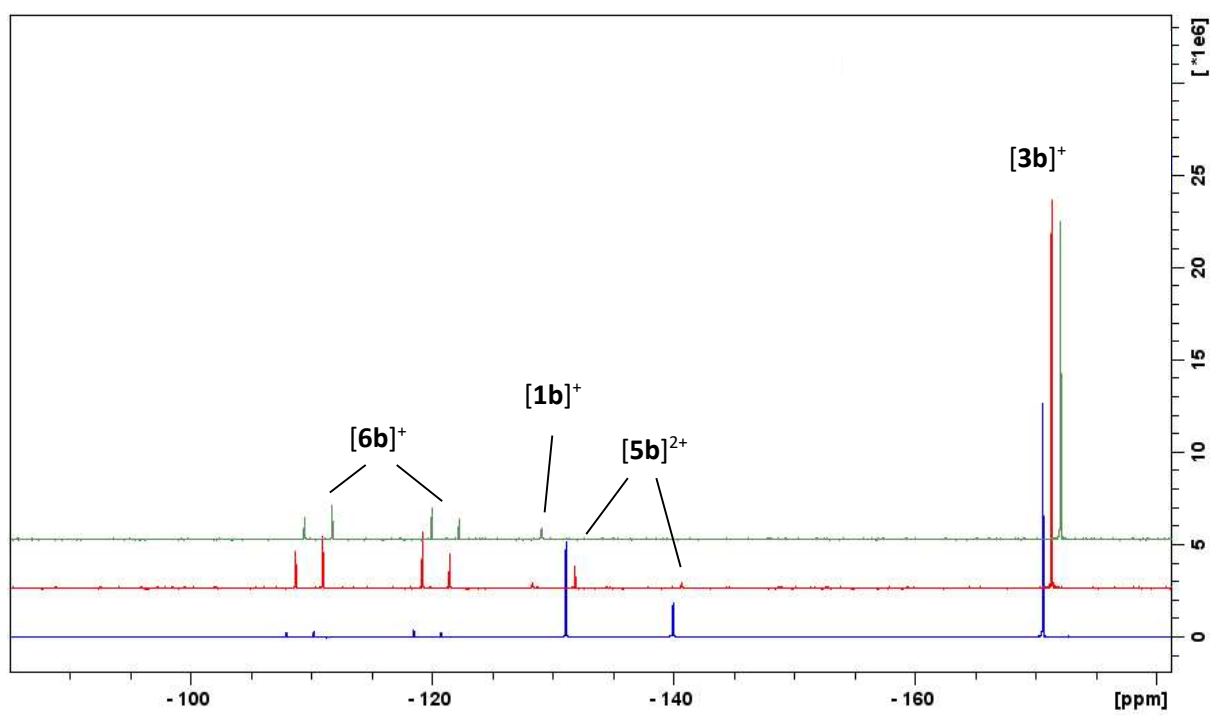

Figure S16.  $^{31}\text{P}\{^1\text{H}\}$  NMR spectra ( $\text{CH}_3\text{CN}$ , 162 MHz) of a freshly prepared solution of  $[\mathbf{5b}][\text{Gal}_4]_2$  in THF a) after addition of 1.1 equiv. of  $\mathbf{2b}$  (blue trace), b) 15 min after addition of a further equiv. of  $\mathbf{2b}$  (red trace), and c) after 48 h (green trace). The formation of  $[\mathbf{1b}]^+$  is due to a follow-up reaction of  $[\mathbf{3a}]^+$

## Computational Studies

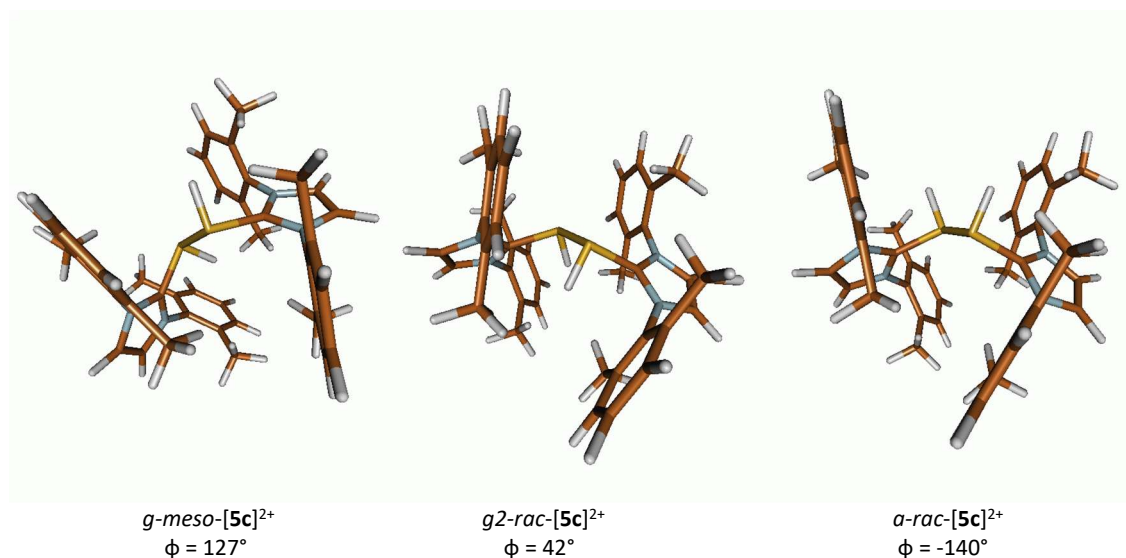

**Figure S17.** Wire-frame representations of the conformers of [5c]<sup>2+</sup> not displayed in Fig. 4.

**Table S2.** Computed relative energies and Gibbs free enthalpies (in kJ/mol) for different conformers of [5c]<sup>2+</sup>.

| Conformer <sup>a)</sup> | $\phi$ <sup>b)</sup> | $E_{zpe}$ <sup>c)</sup> | $\Delta G_{298}^0$ <sup>c)</sup> |
|-------------------------|----------------------|-------------------------|----------------------------------|
| <i>a-meso</i>           | 172                  | 0.0                     | 0.0                              |
| <i>g-meso</i>           | 127                  | 21.3                    | 14.4                             |
| <i>g1-rac</i>           | -92                  | 3.6                     | 2.2                              |
| <i>g2-rac</i>           | 42                   | 24.1                    | 17.0                             |
| <i>a-rac</i>            | -140                 | 20.9                    | 17.7                             |

a) *a* and *g* denote mutual *anti* and *gauche* orientation of the P(H)R-fragments. b) Torsional angle computed as the average of X–P–Y (X, Y = C, H) dihedral angles. c) computed from  $\omega$ B97x-D/def2-tzvp// $\omega$ B97x-D/def2-svp electronic energies and corrections derived from harmonic vibrational analyses at the  $\omega$ B97x-D/def2-svp level of theory.

**Table S3.** Computed (at the B3LYP/def2-tzvp// $\omega$ B97x-D/def2-svp level of theory) <sup>31</sup>P NMR chemical shifts and <sup>1</sup>J<sub>PP</sub> coupling constants (in Hz) for different conformers of [5c]<sup>2+</sup>.

| Conformer <sup>a)</sup>           | $\phi$ <sup>b)</sup> | $\Delta^{31P}$ <sup>c)</sup> | <sup>1</sup> J <sub>PP</sub> <sup>d)</sup> |
|-----------------------------------|----------------------|------------------------------|--------------------------------------------|
| <i>a-meso</i>                     | 172                  | -113.0                       | -81                                        |
| <i>g-meso</i>                     | 127                  | -120.9                       | -298                                       |
| <i>g1-rac</i>                     | -92                  | -134.3                       | -242                                       |
| <i>g2-rac</i>                     | 42                   | -114.0                       | -333                                       |
| <i>a-rac</i>                      | -140                 | -121.0                       | -113                                       |
| <i>meso</i> (243 K) <sup>e)</sup> | --                   | -113.0                       | -81.2                                      |
| <i>meso</i> (298 K) <sup>e)</sup> | --                   | -113.1                       | -82.4                                      |
| <i>rac</i> (243 K) <sup>e)</sup>  | --                   | -134.3                       | -241.9                                     |
| <i>rac</i> (298 K) <sup>e)</sup>  | --                   | -134.2                       | -241.9                                     |

a) *a* and *g* denote mutual *anti* and *gauche* orientation of the P(H)R-fragments. b) Torsional angle computed as the average of X–P–Y (X, Y = C, H) dihedral angles. c) average value for both phosphorus atoms. d) calculated using an uncontracted basis with added tight polarization functions for the core during the computation of the FC term (option "mixed" in g16). e) population weighted average of conformers.

**Table S4.** Results of the NBO/NRT analysis of the  $\omega$ B97X-D/def2-tvzp// $\omega$ B97X-D/def2-svp electron density of *α*-meso-[5d]<sup>2+</sup>

| NBO   | bond order <sup>a)</sup> | WBI <sup>b)</sup> | %P <sup>c)</sup> | Hybridisation (P)                     | %X <sup>c)</sup> | Hybridisation (X)                     |
|-------|--------------------------|-------------------|------------------|---------------------------------------|------------------|---------------------------------------|
| n(P)  | --                       |                   | 100              | sp <sup>0.63</sup> (61.2% s, 38.7%p)  | --               | --                                    |
| σ(PC) | 1.0 (0.70 c, 0.30 i)     | 0.95              | 35               | sp <sup>6.60</sup> (13.0% s, 85.9% p) | 65               | sp <sup>1.67</sup> (37.4% s, 62.5% p) |
| σ(PP) | 1.0 (1.00 c, 0.00 i)     | 0.96              | 50               | sp <sup>8.53</sup> (10.4% s, 88.7% p) | 50               | sp <sup>8.53</sup> (10.4% s, 88.7% p) |
| σ(PH) | 1.0 (0.97 c, 0.03 i)     | 0.96              | 52               | Sp <sup>5.54</sup> (15.4% s, 83.6% p) | 48               | s (99.6% s)                           |

a) natural bond order from NRT analysis with covalent (c) and ionic (i) contributions in parentheses. b) Wiberg bond index. c) percent contribution from the phosphorus and the X atoms to n(P) or σ(PX) LMOs, respectively.

**Table S5.** Local partial charges per PH/P and imidazolio (C<sub>3</sub>H<sub>4</sub>N<sub>2</sub>) subunits in [5d]<sup>2+</sup>, [6d]<sup>+</sup> and 7d (Chart 2, R = H) from NPA analyses of the  $\omega$ B97X-D/def2-tvzp// $\omega$ B97X-D/def2-svp electron densities.

| NBO                               | q(PH) | q(P)  | q(imidazolio)               |
|-----------------------------------|-------|-------|-----------------------------|
| <i>α</i> -meso-[5d] <sup>2+</sup> | +0.34 | --    | +0.66                       |
| [6d] <sup>+</sup>                 | +0.22 | -0.12 | +0.38 (on P), +0.53 (on PH) |
| 7d                                | --    | -0.17 | +0.17                       |

**Table S6.** Computed (at the  $\omega$ B97X-D/def2-svp level of theory) cartesian atomic coordinates (in Å),  $\omega$ B97X-D/def2-tvzp// $\omega$ B97X-D/def2-svp energies (E2) as well as energies (E1) and corrections for vibrational zero-point energies and standard Gibbs free energies calculated at the  $\omega$ B97X-D/def2-svp level of theory (all energy data in Hartree) for different conformers of [5c]<sup>2+</sup>.

| <i>α</i> -meso-[5c] <sup>2+</sup>       |           |           | <i>g1</i> -rac-[5c] <sup>2+</sup>       |   |           |           |           |
|-----------------------------------------|-----------|-----------|-----------------------------------------|---|-----------|-----------|-----------|
| E1 = -2372.688324                       |           |           | E1 = -2372.686155                       |   |           |           |           |
| E2 = -2374.682342                       |           |           | E2 = -2374.680968                       |   |           |           |           |
| zpe-correction = 0.718744               |           |           | zpe-correction = 0.718755               |   |           |           |           |
| G <sup>298</sup> -correction = 0.640229 |           |           | G <sup>298</sup> -correction = 0.639707 |   |           |           |           |
| C                                       | -1.237376 | 2.643022  | -2.201947                               | C | -2.693427 | 3.141208  | -1.468028 |
| C                                       | -0.786522 | 2.938882  | -0.901763                               | C | -2.406791 | 2.637855  | -0.186306 |
| C                                       | -1.641966 | 3.181298  | 0.183382                                | C | -3.311000 | 1.891800  | 0.579471  |
| C                                       | -3.015614 | 3.068730  | -0.059245                               | C | -4.576994 | 1.676227  | 0.021832  |
| C                                       | -3.496609 | 2.759390  | -1.327293                               | C | -4.897108 | 2.157826  | -1.241316 |
| C                                       | -2.618102 | 2.561537  | -2.391127                               | C | -3.959704 | 2.873558  | -1.986214 |
| N                                       | 0.636720  | 2.925094  | -0.676371                               | N | -1.112780 | 2.957234  | 0.371907  |
| C                                       | 1.291447  | 1.902223  | -0.101348                               | C | 0.012259  | 2.251383  | 0.179261  |
| N                                       | 2.601042  | 2.194025  | -0.130595                               | N | 1.004092  | 2.889238  | 0.828980  |
| C                                       | 2.780187  | 3.418440  | -0.738746                               | C | 0.497806  | 4.015002  | 1.434648  |
| C                                       | 1.546247  | 3.876820  | -1.084388                               | C | -0.835174 | 4.055864  | 1.149673  |
| P                                       | 0.535974  | 0.497800  | 0.809105                                | C | 2.372304  | 2.436980  | 0.897309  |
| P                                       | -0.776787 | -0.343608 | -0.825929                               | C | 2.767014  | 1.695478  | 2.020406  |
| C                                       | -1.294078 | -1.835466 | 0.111830                                | C | 4.086911  | 1.234417  | 2.041263  |
| N                                       | -2.467582 | -2.045296 | 0.735893                                | C | 4.959083  | 1.521412  | 0.995538  |
| C                                       | -2.502612 | -3.336978 | 1.211466                                | C | 4.537108  | 2.278758  | -0.094638 |
| C                                       | -1.319228 | -3.921115 | 0.873059                                | C | 3.227855  | 2.759207  | -0.167604 |
| N                                       | -0.589045 | -2.976955 | 0.189334                                | P | 0.089613  | 0.736761  | -0.848584 |
| C                                       | -3.533106 | -1.081954 | 0.884840                                | P | 0.090104  | -0.736877 | 0.848808  |
| C                                       | -4.447129 | -0.941151 | -0.169169                               | C | 0.013207  | -2.251410 | -0.179196 |
| C                                       | -5.482984 | -0.020748 | 0.010647                                | N | 1.005251  | -2.888910 | -0.828941 |
| C                                       | -5.586341 | 0.714788  | 1.188324                                | C | 0.499316  | -4.014777 | -1.434719 |
| C                                       | -4.652225 | 0.555929  | 2.209349                                | C | -0.833660 | -4.056059 | -1.149787 |
| C                                       | -3.598815 | -0.352896 | 2.081092                                | N | -1.111611 | -2.957578 | -0.371924 |
| C                                       | 0.735722  | -3.159317 | -0.352792                               | C | 2.373302  | -2.436163 | -0.897307 |
| C                                       | 1.828527  | -3.063245 | 0.523147                                | C | 3.229070  | -2.758415 | 0.167449  |
| C                                       | 3.100275  | -3.233081 | -0.031008                               | C | 4.538166  | -2.277590 | 0.094473  |
| C                                       | 3.257891  | -3.496329 | -1.388541                               | C | 4.959819  | -1.519846 | -0.995570 |
| C                                       | 2.149553  | -3.599525 | -2.225258                               | C | 4.087459  | -1.232813 | -2.041107 |
| C                                       | 0.855298  | -3.439439 | -1.723711                               | C | 2.767672  | -1.694239 | -2.020227 |
| C                                       | 3.653193  | 1.353415  | 0.387806                                | C | -2.405725 | -2.638633 | 0.186293  |
| C                                       | 4.169437  | 0.355726  | -0.451675                               | C | -3.310222 | -1.892956 | -0.579527 |
| C                                       | 5.199444  | -0.432340 | 0.067636                                | C | -4.576287 | -1.677821 | -0.021896 |
| C                                       | 5.669048  | -0.230943 | 1.363356                                | C | -4.896217 | -2.159462 | 1.241289  |

|   |           |           |           |   |           |           |           |
|---|-----------|-----------|-----------|---|-----------|-----------|-----------|
| C | 5.119309  | 0.760583  | 2.172814  | C | -3.958540 | -2.874782 | 1.986229  |
| C | 4.094526  | 1.583698  | 1.698699  | C | -2.692159 | -3.141987 | 1.468055  |
| H | 1.623915  | -0.377972 | 0.549490  | H | 1.495888  | 0.794150  | -1.033267 |
| H | -1.937832 | 0.378564  | -0.442627 | H | 1.496440  | -0.793733 | 1.033251  |
| H | 3.768851  | 3.850119  | -0.870596 | H | -1.606678 | 4.768769  | 1.428426  |
| H | 1.235132  | 4.791269  | -1.581974 | H | 1.127346  | 4.687037  | 2.012038  |
| H | -0.936434 | -4.922113 | 1.053131  | H | -1.604950 | -4.769159 | -1.428632 |
| H | -3.367335 | -3.726097 | 1.742758  | H | 1.129069  | -4.686549 | -2.012181 |
| C | -4.305440 | -1.730257 | -1.443199 | C | 2.755612  | -3.583881 | 1.334528  |
| H | -6.225865 | 0.107153  | -0.779517 | H | 5.238539  | -2.513008 | 0.898438  |
| H | -6.412427 | 1.417260  | 1.316147  | H | 5.989982  | -1.161306 | -1.038165 |
| H | -4.748491 | 1.134262  | 3.130744  | H | 4.437109  | -0.655899 | -2.899935 |
| C | -2.588209 | -0.548853 | 3.179655  | C | 1.841070  | -1.447446 | -3.182014 |
| C | 1.662933  | -2.834219 | 2.003168  | C | -2.979434 | -1.315995 | -1.930125 |
| H | 3.974651  | -3.170423 | 0.619556  | H | -5.320246 | -1.130724 | -0.603738 |
| H | 4.259006  | -3.640636 | -1.799972 | H | -5.892647 | -1.986180 | 1.652599  |
| H | 2.285890  | -3.827268 | -3.284392 | H | -4.221555 | -3.250870 | 2.976862  |
| C | -0.350210 | -3.566137 | -2.616201 | C | -1.671376 | -3.927491 | 2.246885  |
| C | 3.618977  | 0.125306  | -1.833656 | C | -2.979985 | 1.314910  | 1.930044  |
| H | 5.645779  | -1.206481 | -0.559907 | H | -5.320750 | 1.128845  | 0.603663  |
| H | 6.482086  | -0.850509 | 1.746849  | H | -5.893474 | 1.984197  | -1.652637 |
| H | 5.498899  | 0.909693  | 3.185660  | H | -4.222870 | 3.249612  | -2.976820 |
| C | 3.496105  | 2.673309  | 2.548561  | C | -1.672995 | 3.927310  | -2.246719 |
| C | -1.142147 | 3.535458  | 1.559669  | C | 2.754046  | 3.583988  | -1.335029 |
| H | -3.715420 | 3.242516  | 0.760578  | H | 5.237336  | 2.514192  | -0.898726 |
| H | -4.572868 | 2.686250  | -1.493328 | H | 5.989351  | 1.163172  | 1.038124  |
| H | -3.007959 | 2.337229  | -3.386098 | H | 4.436830  | 0.657851  | 2.900214  |
| C | -0.279415 | 2.415392  | -3.341471 | C | 1.840520  | 1.448759  | 3.182293  |
| H | -0.795023 | 1.962339  | -4.197204 | H | -2.102137 | 4.304396  | -3.182969 |
| H | 0.159234  | 3.363208  | -3.690012 | H | -1.300020 | 4.793507  | -1.679017 |
| H | 0.552466  | 1.751816  | -3.058269 | H | -0.803433 | 3.303019  | -2.511640 |
| H | -1.775402 | 4.316315  | 2.002219  | H | -3.749274 | 1.588396  | 2.666126  |
| H | -1.183530 | 2.664035  | 2.232619  | H | -2.960667 | 0.214095  | 1.875405  |
| H | -0.109670 | 3.910374  | 1.553330  | H | -2.010259 | 1.651501  | 2.320614  |
| H | 4.273733  | -0.541909 | -2.407623 | H | -2.960750 | -0.215164 | -1.875572 |
| H | 2.625178  | -0.353827 | -1.791284 | H | -2.009498 | -1.652085 | -2.320597 |
| H | 3.515162  | 1.062213  | -2.401328 | H | -3.748528 | -1.589965 | -2.666235 |
| H | 3.906399  | 2.644982  | 3.565342  | H | -2.100753 | -4.305803 | 3.182533  |
| H | 3.709351  | 3.671062  | 2.134389  | H | -1.296881 | -4.792783 | 1.678814  |
| H | 2.401384  | 2.575882  | 2.628247  | H | -0.802808 | -3.302293 | 2.512953  |
| H | -0.085518 | -4.065550 | -3.556437 | H | 2.169940  | -0.580205 | -3.769238 |
| H | -1.154073 | -4.148892 | -2.142699 | H | 1.833227  | -2.313432 | -3.862982 |
| H | -0.760307 | -2.576145 | -2.875031 | H | 0.798496  | -1.274706 | -2.873191 |
| H | 2.540678  | -2.319073 | 2.416556  | H | 3.595848  | -3.859346 | 1.983610  |
| H | 0.770496  | -2.240435 | 2.251897  | H | 2.028118  | -3.035873 | 1.956316  |
| H | 1.569406  | -3.793596 | 2.536495  | H | 2.269196  | -4.514565 | 1.005912  |
| H | -5.202956 | -1.632026 | -2.066239 | H | 3.594618  | 3.862160  | -1.982525 |
| H | -3.451661 | -1.371547 | -2.043647 | H | 2.029286  | 3.034111  | -1.958378 |
| H | -4.147762 | -2.802131 | -1.251318 | H | 2.264340  | 4.513092  | -1.006874 |
| H | -2.764382 | 0.155879  | 4.001779  | H | 2.170492  | 0.582680  | 3.770602  |
| H | -2.639228 | -1.564412 | 3.601995  | H | 1.831222  | 2.315533  | 3.862236  |
| H | -1.559226 | -0.392036 | 2.818489  | H | 0.798269  | 1.274125  | 2.873411  |

**Table S6.** Continued.

| <i>g2-rac</i> -[5c] <sup>2+</sup>       |           |          | <i>g-meso</i> -[5c] <sup>2+</sup>       |   |          |          |           |
|-----------------------------------------|-----------|----------|-----------------------------------------|---|----------|----------|-----------|
| E1 = -2372.677420                       |           |          | E1 = -2372.678770                       |   |          |          |           |
| E2 = -2374.672631                       |           |          | E2 = -2374.673901                       |   |          |          |           |
| zpe-correction = 0.718198               |           |          | zpe-correction = 0.718404               |   |          |          |           |
| G <sup>298</sup> -correction = 0.637009 |           |          | G <sup>298</sup> -correction = 0.637268 |   |          |          |           |
| C                                       | -1.643426 | 3.185368 | 0.550862                                | C | 1.867939 | 3.064553 | -0.842140 |
| C                                       | -0.398251 | 3.000333 | 1.175120                                | C | 0.560394 | 3.027690 | -1.353501 |
| C                                       | -0.228781 | 2.915215 | 2.567585                                | C | 0.252457 | 3.077371 | -2.721934 |
| C                                       | -1.381994 | 2.994758 | 3.351238                                | C | 1.331443 | 3.139823 | -3.609084 |
| C                                       | -2.634368 | 3.160896 | 2.765263                                | C | 2.641521 | 3.167625 | -3.138606 |

|   |           |           |           |   |           |           |           |
|---|-----------|-----------|-----------|---|-----------|-----------|-----------|
| C | -2.763850 | 3.256835  | 1.382820  | C | 2.907465  | 3.133339  | -1.771270 |
| N | 0.771237  | 2.884404  | 0.340483  | N | -0.530552 | 2.945033  | -0.412963 |
| C | 1.384345  | 1.731794  | 0.028110  | C | -1.197761 | 1.824865  | -0.094241 |
| N | 2.414325  | 2.031841  | -0.781695 | N | -2.142598 | 2.161694  | 0.801740  |
| C | 2.448329  | 3.393617  | -0.994908 | C | -2.062652 | 3.513353  | 1.063788  |
| C | 1.416262  | 3.929719  | -0.289644 | C | -1.048164 | 4.004536  | 0.302989  |
| P | 1.131483  | 0.036046  | 0.708777  | P | -1.093768 | 0.171267  | -0.904498 |
| P | -1.131525 | -0.036475 | 0.708973  | P | 1.122816  | -0.176390 | -0.817946 |
| C | -1.384360 | -1.731728 | 0.027054  | C | 1.230339  | -1.820972 | 0.003536  |
| N | -2.414267 | -2.031212 | -0.783053 | N | 2.153544  | -2.063656 | 0.953464  |
| C | -2.448267 | -3.392841 | -0.997196 | C | 2.090437  | -3.382273 | 1.329829  |
| C | -1.416263 | -3.929436 | -0.292212 | C | 1.099051  | -3.958742 | 0.591256  |
| N | -0.771278 | -2.884556 | 0.338674  | N | 0.579983  | -2.979376 | -0.219321 |
| C | -3.317359 | -1.052465 | -1.337292 | C | 3.059610  | -1.081578 | 1.503875  |
| C | -2.995126 | -0.501271 | -2.586678 | C | 2.714824  | -0.496817 | 2.731152  |
| C | -3.853180 | 0.480334  | -3.086707 | C | 3.593932  | 0.456487  | 3.248733  |
| C | -4.974747 | 0.880457  | -2.362002 | C | 4.760873  | 0.793375  | 2.566109  |
| C | -5.262234 | 0.310598  | -1.124394 | C | 5.072482  | 0.187598  | 1.352198  |
| C | -4.434555 | -0.675831 | -0.579119 | C | 4.224550  | -0.771088 | 0.789744  |
| C | 0.398147  | -3.001112 | 1.173327  | C | -0.519387 | -3.151778 | -1.137875 |
| C | 0.228312  | -2.917553 | 2.565868  | C | -0.219980 | -3.384456 | -2.491029 |
| C | 1.381287  | -2.997844 | 3.349737  | C | -1.301349 | -3.507905 | -3.365223 |
| C | 2.633851  | -3.163261 | 2.763889  | C | -2.611848 | -3.423107 | -2.899037 |
| C | 2.763691  | -3.257658 | 1.381405  | C | -2.870983 | -3.227070 | -1.546868 |
| C | 1.643471  | -3.185322 | 0.549193  | C | -1.825733 | -3.095068 | -0.626951 |
| C | 3.317507  | 1.053461  | -1.336436 | C | -3.085897 | 1.243432  | 1.390582  |
| C | 2.995557  | 0.503169  | -2.586290 | C | -2.796973 | 0.738203  | 2.667394  |
| C | 3.853702  | -0.478113 | -3.086808 | C | -3.704681 | -0.173988 | 3.210454  |
| C | 4.975066  | -0.878806 | -2.362110 | C | -4.845945 | -0.548697 | 2.504372  |
| C | 5.262281  | -0.309828 | -1.124031 | C | -5.105582 | -0.019252 | 1.242894  |
| C | 4.434523  | 0.676264  | -0.578269 | C | -4.228299 | 0.896905  | 0.654022  |
| H | -1.369850 | 0.580086  | -0.546308 | H | 1.177239  | -0.686810 | -2.141062 |
| H | 1.369499  | -0.579620 | -0.547006 | H | -1.445840 | -0.512711 | 0.283858  |
| H | -3.204905 | -3.854120 | -1.626382 | H | 2.756531  | -3.796505 | 2.082147  |
| H | -1.081901 | -4.957035 | -0.178345 | H | 0.719477  | -4.977053 | 0.573220  |
| H | 3.205032  | 3.855338  | -1.623691 | H | -2.739121 | 4.001554  | 1.760118  |
| H | 1.081924  | 4.957245  | -0.175063 | H | -0.651442 | 5.010806  | 0.198407  |
| C | -1.130241 | -2.742112 | 3.192535  | C | 1.195703  | -3.562196 | -2.973323 |
| H | 1.291891  | -2.943108 | 4.436566  | H | -1.112299 | -3.687513 | -4.425494 |
| H | 3.521047  | -3.229274 | 3.396494  | H | -3.441825 | -3.526379 | -3.600465 |
| H | 3.750707  | -3.393002 | 0.934032  | H | -3.902175 | -3.183487 | -1.189577 |
| C | 1.795821  | -3.295371 | -0.945631 | C | -2.126976 | -2.935265 | 0.841482  |
| C | -1.777535 | -0.952813 | -3.348990 | C | 1.465211  | -0.897102 | 3.469631  |
| H | -3.645524 | 0.928700  | -4.060573 | H | 3.366279  | 0.931455  | 4.205335  |
| H | -5.640730 | 1.641135  | -2.774086 | H | 5.442554  | 1.531673  | 2.992800  |
| H | -6.151169 | 0.624761  | -0.573520 | H | 5.996982  | 0.450604  | 0.833870  |
| C | -4.725130 | -1.300376 | 0.760034  | C | 4.543477  | -1.413721 | -0.533792 |
| C | 1.778212  | 0.955332  | -3.348622 | C | -1.579851 | 1.185213  | 3.432249  |
| H | 3.646263  | -0.925781 | -4.061042 | H | -3.520473 | -0.585141 | 4.205242  |
| H | 5.641107  | -1.639234 | -2.774561 | H | -5.550143 | -1.253892 | 2.950091  |
| H | 6.151076  | -0.624412 | -0.573169 | H | -6.014015 | -0.305687 | 0.708782  |
| C | 4.724894  | 1.299968  | 0.761321  | C | -4.501818 | 1.474780  | -0.709898 |
| C | 1.129457  | 2.738685  | 3.194632  | C | -1.170961 | 3.074584  | -3.215424 |
| H | -1.292880 | 2.938830  | 4.438032  | H | 1.137064  | 3.187035  | -4.682513 |
| H | -3.521728 | 3.226271  | 3.397703  | H | 3.468320  | 3.228221  | -3.848925 |
| H | -3.750743 | 3.392744  | 0.935351  | H | 3.939368  | 3.162491  | -1.415429 |
| C | -1.795098 | 3.297213  | -0.943890 | C | 2.138506  | 3.009736  | 0.636694  |
| H | 2.750540  | -2.857072 | -1.269225 | H | 5.615505  | -1.337120 | -0.755154 |
| H | 1.796943  | -4.350266 | -1.262689 | H | 4.273209  | -2.479517 | -0.559075 |
| H | 0.987331  | -2.792971 | -1.497192 | H | 4.009400  | -0.908396 | -1.356875 |
| H | -1.108302 | -3.036915 | 4.249124  | H | 1.246315  | -0.186394 | 4.276319  |
| H | -1.458184 | -1.689828 | 3.156136  | H | 0.586983  | -0.940200 | 2.806009  |
| H | -1.898356 | -3.349072 | 2.691305  | H | 1.574113  | -1.890833 | 3.932034  |
| H | 1.617501  | 0.330186  | -4.235886 | H | 1.243063  | -3.521277 | -4.068558 |

|   |           |           |           |   |           |           |           |
|---|-----------|-----------|-----------|---|-----------|-----------|-----------|
| H | 0.866598  | 0.907613  | -2.730298 | H | 1.885554  | -2.801704 | -2.578287 |
| H | 1.881931  | 1.996226  | -3.692709 | H | 1.588196  | -4.544368 | -2.664863 |
| H | 5.702882  | 0.975913  | 1.137638  | H | -3.004458 | -2.289773 | 0.993809  |
| H | 4.736510  | 2.398904  | 0.706128  | H | -2.363972 | -3.911867 | 1.292350  |
| H | 3.970947  | 1.011596  | 1.512175  | H | -1.289603 | -2.511677 | 1.414870  |
| H | -2.751169 | 2.862389  | -1.268088 | H | -1.376893 | 0.508000  | 4.271468  |
| H | -1.792511 | 4.352356  | -1.260130 | H | -0.680677 | 1.227939  | 2.798391  |
| H | -0.988142 | 2.792527  | -1.495647 | H | -1.726481 | 2.191918  | 3.854540  |
| H | 1.108041  | 3.036038  | 4.250529  | H | -5.560247 | 1.358187  | -0.974433 |
| H | 1.455233  | 1.685636  | 3.160840  | H | -4.260197 | 2.546488  | -0.760997 |
| H | 1.898842  | 3.342883  | 2.692048  | H | -3.913667 | 0.961734  | -1.489273 |
| H | -5.703349 | -0.976872 | 1.136226  | H | 3.204157  | 2.834540  | 0.831133  |
| H | -4.736317 | -2.399286 | 0.704280  | H | 1.858204  | 3.950168  | 1.136285  |
| H | -3.971508 | -1.012107 | 1.511258  | H | 1.578361  | 2.194682  | 1.123153  |
| H | -1.616888 | -0.327322 | -4.236023 | H | -1.215482 | 3.373744  | -4.269901 |
| H | -0.866029 | -0.904989 | -2.730508 | H | -1.625885 | 2.073127  | -3.140467 |
| H | -1.880857 | -1.993630 | -3.693426 | H | -1.802616 | 3.770565  | -2.643402 |

**Table S6.** continued

---

*a-rac*-[5c]<sup>2+</sup>  
E1 = -2372.678718  
E2 = -2374.673811  
zpe-correction = 0.718163  
G<sup>298</sup>-correction = 0.638434

---

|   |           |           |           |
|---|-----------|-----------|-----------|
| C | -4.207360 | 0.930319  | 0.666154  |
| C | -3.051012 | 1.183356  | 1.418147  |
| C | -2.794358 | 0.608826  | 2.671364  |
| C | -3.751878 | -0.275579 | 3.173312  |
| C | -4.909836 | -0.555954 | 2.452108  |
| C | -5.134549 | 0.038889  | 1.213372  |
| N | -2.080855 | 2.117630  | 0.894463  |
| C | -1.164140 | 1.852954  | -0.056900 |
| N | -0.472331 | 2.989735  | -0.262955 |
| C | -0.951925 | 3.974802  | 0.564098  |
| C | -1.966365 | 3.426701  | 1.291842  |
| C | 0.610696  | 3.159396  | -1.201457 |
| C | 1.922732  | 3.015320  | -0.727788 |
| C | 2.951090  | 3.176524  | -1.660667 |
| C | 2.668519  | 3.475945  | -2.990069 |
| C | 1.351937  | 3.630193  | -3.419892 |
| C | 0.286779  | 3.482989  | -2.528559 |
| P | -1.102743 | 0.212655  | -0.899975 |
| P | 1.102816  | -0.213067 | -0.900190 |
| C | 1.164168  | -1.852996 | -0.056385 |
| N | 2.080770  | -2.117279 | 0.895187  |
| C | 1.966378  | -3.426241 | 1.292948  |
| C | 0.952082  | -3.974670 | 0.565247  |
| N | 0.472512  | -2.989922 | -0.262192 |
| C | 3.050780  | -1.182758 | 1.418700  |
| C | 2.793793  | -0.607775 | 2.671655  |
| C | 3.751181  | 0.276763  | 3.173577  |
| C | 4.909338  | 0.556892  | 2.452576  |
| C | 5.134331  | -0.038305 | 1.214075  |
| C | 4.207279  | -0.929924 | 0.666893  |
| C | -0.610435 | -3.159935 | -1.200726 |
| C | -0.286386 | -3.483949 | -2.527694 |
| C | -1.351452 | -3.631488 | -3.419075 |
| C | -2.668083 | -3.477143 | -2.989426 |
| C | -2.950789 | -3.177304 | -1.660151 |
| C | -1.922523 | -3.015762 | -0.727222 |
| H | 1.038381  | -0.754658 | -2.211834 |
| H | -1.038770 | 0.753622  | -2.211902 |
| H | 2.618835  | -3.854585 | 2.049124  |
| H | 0.534540  | -4.978170 | 0.560906  |

|   |           |           |           |
|---|-----------|-----------|-----------|
| H | -2.618891 | 3.855354  | 2.047783  |
| H | -0.534294 | 4.978264  | 0.559467  |
| C | 1.137843  | -3.714506 | -2.960396 |
| H | -1.145062 | -3.885773 | -4.460694 |
| H | -3.485696 | -3.603515 | -3.701634 |
| H | -3.987220 | -3.069836 | -1.333365 |
| C | -2.225681 | -2.721498 | 0.717176  |
| C | 1.560752  | -0.954308 | 3.462827  |
| H | 3.591108  | 0.741451  | 4.148757  |
| H | 5.652292  | 1.241073  | 2.866875  |
| H | 6.053729  | 0.177287  | 0.665658  |
| C | 4.443681  | -1.571284 | -0.674424 |
| C | -1.561633 | 0.955729  | 3.462866  |
| H | -3.592050 | -0.739955 | 4.148680  |
| H | -5.652878 | -1.240029 | 2.866425  |
| H | -6.053820 | -0.176860 | 0.664808  |
| C | -4.443405 | 1.571491  | -0.675316 |
| C | -1.137394 | 3.713497  | -2.961469 |
| H | 1.145650  | 3.884140  | -4.461614 |
| H | 3.486204  | 3.602061  | -3.702240 |
| H | 3.987488  | 3.069125  | -1.333752 |
| C | 2.225704  | 2.721434  | 0.716723  |
| H | 1.365271  | -0.194549 | 4.230288  |
| H | 0.665891  | -1.038950 | 2.827703  |
| H | 1.681910  | -1.917255 | 3.984031  |
| H | 5.510551  | -1.554617 | -0.930510 |
| H | 4.110508  | -2.619184 | -0.702207 |
| H | 3.913451  | -1.024955 | -1.473282 |
| H | 1.200752  | -3.835005 | -4.048863 |
| H | 1.808527  | -2.888658 | -2.676450 |
| H | 1.543660  | -4.631301 | -2.504009 |
| H | -3.199331 | -2.223890 | 0.817180  |
| H | -2.265802 | -3.651115 | 1.307169  |
| H | -1.472958 | -2.067599 | 1.183058  |
| H | 3.199511  | 2.224201  | 0.817011  |
| H | 2.265363  | 3.651155  | 1.306582  |
| H | 1.473124  | 2.067331  | 1.182559  |
| H | -1.200187 | 3.833697  | -4.049976 |
| H | -1.808155 | 2.887770  | -2.677360 |
| H | -1.543206 | 4.630443  | -2.505378 |
| H | -1.365998 | 0.195909  | 4.230230  |
| H | -0.666654 | 1.040927  | 2.827992  |
| H | -1.683384 | 1.918509  | 3.984241  |
| H | -5.509961 | 1.553074  | -0.932566 |
| H | -4.111955 | 2.619963  | -0.702459 |
| H | -3.911380 | 1.026299  | -1.473753 |

---
